# Supplementary material for: HDAC4 regulates satellite cell proliferation and differentiation by targeting P21 and Sharp1 genes
Source: PubMed Central journal article supplement (PMC5823886; doi:10.1038/s41598-018-21835-7), 2018-02-22

HDAC4 regulates satellite cell proliferation and differentiation by targeting P21 and Sharp1 genes

Nicoletta Marroncelli<sup>1</sup>, Marzia Bianchi<sup>1</sup>, Marco Bertin<sup>1</sup>, Silvia Consalvi<sup>2</sup>, Valentina Saccone<sup>2</sup>, Marco De Bardi<sup>2</sup>, Pier Lorenzo Puri<sup>2</sup>, Daniela Palacios<sup>2</sup>, Sergio Adamo<sup>1</sup>, Viviana Moresi<sup>1,3,\*</sup>

## Supplementary Information

### Supplementary Figure Legends

**Supplementary Figure S1. HDAC4 expression is reduced in HDAC4 KO satellite cells.** HDAC4 expression in HDAC4 KO and control satellite cells, analyzed by (a) real-time PCR (n=6 each sample) and (b) western blot (cropped blots) analyses, with relative densitometry (n=3 each sample).  $\alpha$ -Tubulin was used as a loading control. Full-length blots are presented in Supplementary Figure S2A. Data are presented as mean  $\pm$  SEM. \*p<0.05; \*\*p<0.005 (Student's t-test).

**Supplementary Figure S2. Full-length western blots.** Uncropped gels showing the expression of (a) HDAC4 and (b) MHC in HDAC4 KO (KO) and control (C) satellite cells.  $\alpha$ -Tubulin was used as a loading control.

**Supplementary Figure S3. HDAC4 intrinsically regulate satellite cell differentiation.** (a) Immunofluorescence for MHC in wild-type satellite cells cultured with conditioned medium from HDAC4 KO or control satellite cells. Conditioned media from n=3 mice, per each condition. Scale bar: 100  $\mu$ m. (b) Quantification of the differentiation and fusion indexes in wild-type satellite cells cultured with conditioned medium from HDAC4 KO or control satellite cells. n=3 each condition. Data are presented as mean  $\pm$  SEM. (c) HDAC4 expression in satellite cells treated with vehicle or 4OH-TMX, analyzed by real-time PCR. n=4 each sample. Data are presented as mean  $\pm$  SEM. \*p<0.05 (Student's t-test).

**Supplementary Figure S4. HDAC4 does not affect apoptosis in satellite cells.** (a) TUNEL assay and quantification of apoptotic cells in control, HDAC4 KO samples, and positive controls of the assay. Scale bar: 50 and 100  $\mu$ m. n=5 per genotype; n=3 for the positive controls. \*\*p<0.005 (Student's t-test). (b) Expression of indicated apoptotic markers in control and HDAC4 KO satellite cells. n=4 for each sample. Data are presented as mean  $\pm$  SEM.

**Supplementary Figure S5. Overexpression of HDAC4 in HDAC4 S/A overexpressing muscle cells.** HDAC4 expression in primary myotubes infected with adenovirus expressing HDAC4 S/A or GFP, as control. n=5 GFP, n=7 HDAC4 S/A. Data are presented as mean  $\pm$  SEM. \*\*\*p<0.001 (Student's t-test).

**Supplementary Figure S6. Downregulation of P21 in HDAC4 KO satellite cells.** (a) Immunofluorescence for P21 in HDAC4 KO satellite cells treated with UC2288 or

vehicle for 24 hours. Scale bar: 50  $\mu\text{m}$ . **(b)** Expression of P21 in HDAC4 KO satellite cells transfected with a pool of four siRNA against P21 (P21) or a pool of non-targeting siRNA (Scr), as control. n=5 Scr and n=7 P21. Data are presented as mean  $\pm$  SEM. \*p<0.05 (Student's t-test).

**Supplementary Figure S7. Downregulation of Sharp1 in muscle cells.** Sharp1 expression in C2C12 cells transfected with Sharp1 shRNA or scramble (shScr) expression vector, as control. n=4 each sample. Data are presented as mean  $\pm$  SEM. \*p<0.05 (Student's t-test).

**Supplementary Table S1.** List of genes in each gene ontology category of the RNA-seq results.

| Biological Process    | Genes                                                                                                                                                                                                                                                                                                                                                                                                                                                                                                                                                                                                                                                                                                                                                                                                                                                                                                                                                                                                                                                                                                                                                                                                |
|-----------------------|------------------------------------------------------------------------------------------------------------------------------------------------------------------------------------------------------------------------------------------------------------------------------------------------------------------------------------------------------------------------------------------------------------------------------------------------------------------------------------------------------------------------------------------------------------------------------------------------------------------------------------------------------------------------------------------------------------------------------------------------------------------------------------------------------------------------------------------------------------------------------------------------------------------------------------------------------------------------------------------------------------------------------------------------------------------------------------------------------------------------------------------------------------------------------------------------------|
| Response to stimulus  | <p>fas, taok1, fap, ccl2, srpk3, hmga2, fh11, hspb3, dact2, pdgfb, mapkapk3, f3, spint1, ctsh, sema3c, nod1, evalc, penk, slit2, cxcl5, lif, fbn1, ndrg1, hk1, ngf, abcc9, map3k2, itgb7, igha, ptgir, gabre, cgregf1, sema3e, anxa8, gpx3, cxcl3, ttc1, itgb5, il20rb, tie1, txndc2, hspb8, gpx3, plet1, mxipl, gpr97, tnfaip3, wnt11, pak6, csf1, gria3, nkd2, tll1, pamr1, pdk1, slc30a4, inhba, pik3c2a, trp53inp1, arhgap23, slc39a4, tnfrsf1b, atg9b, tshr, cryab, gpx7, sqstm1, clec4d, ubxn2b, xiap, ptk2b, gal, sema7a, tek, kpna3, cripl, angpt4, anpep, wnt5a, cma1, il12rb2, fzd6, ccl9, bdkrb1, zfp385a, cxcl2, gpr3711, cd55, p2rx6, sod3, mapk13, procr, icam1, ppp3cb, tfpi2, hspb7, neto2, cyr61, rcan2, timp3, pik3r3, crlf1, cdc42ep1, ppap2b, cxcl14, hmga1, tec, klk8, il11, adrb2, def6, rom1, nuak2, ccl7, phldb3, fcgrt, il21r, fign1, pdzd2, ndrg2, sgk1, osmr, blnk, itgb3, efna5, cxcl16, wnt10b, ikbke, hspb1, cx3cl1, eda2r, pgf, p2rx7, klk8, ncf2, itpr3, ttc12, rad1, wnt7b, psme1, tec, trib3, hfe2, adat1, ctgf, dusp6, mocos, tmx3, slc38a3, ngfr, il4ra, cd99</p>                                                                                                |
| Developmental process | <p>scube1, fas, taok1, mier3, fgf1, plxna4, numbl, myo7a, lce1g, csrp3, bmpr2, fh11, mbp, micall1, mef2c, slit2, phex, fgf11, cdh5, cidea, fgf5, vat1, mical2, fbn1, ngf, cdh19, myh11, adamts1, tpm1, map3k2, lmod2, notch4, traf1, fubp1, olfml2a, fgd3, lce1f, tie1, tmeff2, dusp1, rbp1, maob, spdef, phactr1, plet1, myh3, gpr97, wnt11, pak6, foxo3, cgnl1, csf1, dtx4, tll1, b3galt5, inhba, crabp1, tnfrsf1b, ldb3, tshr, myh9, myh8, pacsin1, clec3b, neurl3, adam3, xiap, ptk2b, pvalb, arhgef28, col4a1, lama2, tmp3-rs7, bhlhe22, tek, ier3, cripl, arhgef3, angpt4, wnt5a, tnc, myom2, il12rb2, myf6, fabp4, itm2b, cd80, bhlhe40, col16a1, zfp385a, mbnl2, gpr3711, myl2, mybpc2, ptgis, ntn4, olfml3, tgfb1i1, ppp3cb, neto2, cyr61, pcdh7, cdh11, syne4, plekhh1, tlr9, ankrd2, map6, tec, klk8, phldb3, mcam, il21r, acp5, plxnb3, myod1, fmod, intm2c, utr, pdzd2, neurl3, dmp1, ndrg2, fat1, mylpf, vdr, sgk1, osmr, tnmd, lamc3, efna5, myo1e, atoh8, wt10b, scube3, adam12, lingo2, pcdh20, myh7, crabp2, foxd3, eda2r, pgf, gli2, creb3l1, jag2, clip1, lce1h, gdnf, wnt7b, tec, lrn1, adat1, plp1, ctgf, dusp6, myog, hoxa10, bhlhe41, ngfr, mybpc1, hoxb2, col5a3, tgfb1</p> |
| Metabolic process     | <p>isg15, elovl6, rpl39l, cyb5a, mier3, hk1, aebp1, rbpj, h2afj, ak1, plxna4, lce1g, fap, ccl2, hmga2, fh11, larp7, hspb3, pddc1, ass1, anxa5, anxa3, apobec1, g2e3, upf3a, ube3a, mapkapk3, hist1h1c, spint1, pck2, fbp2, ctsh, selt, adh7, ptma, pdk1, cox6a2, aim1, nod1, atp9a, ptms, gfpt2, phex, naa50, hmgs1, gm20939, ppp1r3c, psmc1, ndufs7, cpeb2, ugcg, prrg1, pcna-ps2, mt-nd2, adamts1, enpp1, hebp2, slc1a2, igha, tbc1d2, pgam2, s100a16, ptpre, cpt1c, adprhl1,</p>                                                                                                                                                                                                                                                                                                                                                                                                                                                                                                                                                                                                                                                                                                                  |

|                  |                                                                                                                                                                                                                                                                                                                                                                                                                                                                                                                                                                                                                                                                                                                                                                                                                                                                                                                                                                                                                                                                                                                                                                                                                                                                                                                                                                                                                                                                                                                                                                                                                                                                                                                                                                                                                                                                                                                                                                                                                                                                                                                                                                                                                                          |
|------------------|------------------------------------------------------------------------------------------------------------------------------------------------------------------------------------------------------------------------------------------------------------------------------------------------------------------------------------------------------------------------------------------------------------------------------------------------------------------------------------------------------------------------------------------------------------------------------------------------------------------------------------------------------------------------------------------------------------------------------------------------------------------------------------------------------------------------------------------------------------------------------------------------------------------------------------------------------------------------------------------------------------------------------------------------------------------------------------------------------------------------------------------------------------------------------------------------------------------------------------------------------------------------------------------------------------------------------------------------------------------------------------------------------------------------------------------------------------------------------------------------------------------------------------------------------------------------------------------------------------------------------------------------------------------------------------------------------------------------------------------------------------------------------------------------------------------------------------------------------------------------------------------------------------------------------------------------------------------------------------------------------------------------------------------------------------------------------------------------------------------------------------------------------------------------------------------------------------------------------------------|
|                  | <p>fas, srsf7, fubp1, olfml2a, atp11b, lce1f, adamts15, anxa8, has2, gpx3, azin2, reep2, mterf1b, cyp4f17, ttc1, ucp1, sh3kbp1, ptges, hdac4, plin2, txndc2, maob, pim3, acox2, cast, spdef, hspb8, plin1, manba, ptpf, gpx8, zc3hav11, ctdspl, slc5a5, mlxipl, pmm1, tnfaip3, pak6, grhl3, tfap4, khk, dctd, rgs10, foxo3, hist1h2bc, mbp, plau, cbx3, hccs, dtx4, zik1,.mvp, xrcc5, pamr1, pdk1, seh11, galnt6, ptgr1, sp3, b3galt5, phf6, cox8b, inhba, pik3c2a, ptpn7, trp53inp1, arhgap23, lox, rnf138, sp4, six4, cyp26b1, ptp4a3, osr1, fap, mdx1, prodh2, s100a7a, atg9b, nrap, hebp1, ldb3, tshr, mdx4, cryab, srsf10, mgam, adamts12, gpx7, bmi1, ttl19, pcyox11, slpi, sqstm1, ubxn2b, pknox1, xiap, plin5, ptk2b, alg6, capn3, gm10073, bhlhe22, hist3h2ba, mov1011, aim1, ppp1r27, prkcsh, rybpcrip1, klhdc7a, anpep, cma1, ndufaf2, rps27, ctsw, myf6, abca1, ccl9, mt-nd4, itm2b, atp10a, atad2, gm10330, ythdc2, galm, xdh, ddx3y, pura, zfp385a, adamts11, sox2, sulf1, s100a8, suynm, impad1, calr3, agt, lox14, gpr3711, rgs3, mt-co1, trove2, ptgis, olfml3, cpa4, cnot6, zfp418, cstb, pif1, pck1, sp7, gm8730, ppp3cb, tfpi2, hspb7, gar1, acsbg1, cav3, tcap, rcan2, kif1a, etnk1, mdm2, timp3, pik3r3, ankrd2, ucp2, cdc42ep1, alox5, ppap2b, hmga1, nedd8, st18, las11, adrb2, dcun1d1, ddx6, shpk, def6, ptpn13, gt1, ampd3, nuak2, ccl7, ptpfv, pcyt1b, ckb, eef1a2, fign11, uty, asprv1, lox11, thap2, s100a9, aff3, plxnb3, cwc15, clock, lsm8, pphln1, atp6v1h, e2f2, myod1, fmod, gpd11, mettl4, gtf2f1, gpd11, itm2c, sox10, stk17b, sox11, dmp1, adamts13, hcls1, sord, metap2, tbc1d9, htra3, sulf2, klhl26, sgk1, zfp81, larp4, slc1a5, id3, rgs16, atoh8 hr, ampd1, lingo2, nucks1, gss, d7ertd443e, hspb1, peak1, rpl19, kbtbd7, rgs9, slc25a48, cx3c11, cpe, polr2f, tbca, sult4a1, foxd3, mt-nd5, pgm5, eda2r, leo1, trmt61a, sln, klk8, syf2, ptges3, pla2g4a, itih5, os9, clip1, lce1h, ttc12, rad1, purb, hexa, cpox, urb1, atp13a3, ctrb1, psme1, bdh1, tec, parp14, slc27a1, zbtb14, trib3, lmcd1, ppif, sacm11, ero11, nt5dc2, lrn1, tescl, hfe2, pias3, uchl1, rnf19b, adat1, atp2a1, myog, lpin1, hoxa10, zfp28, hmox1, fmr1, eif2s3y, arhgap5, hsd3b6, hoxb2, mt-atp8, atp2b4, pqlc3</p> |
| Cellular process | <p>scube1, tbkbp1, fas, taok1, tnfaip2, elovl6, rpl39l, spink2, mier3, arhgdib, hk1, aebp1, actg2, fgf1, h2afj, plxna4, numbl, myo7a, cotl1, lce1g, fap, gprc5a, ccl2, srpk3, tmem202, gng11, hmga2, pddc1, daam2, ass1, dact2, mbp, capg, pdgfb, mapre3, eube3a, mapkapk3, hist1h1c, cd36, ctsh, pdk1, pls3, rap1a, synm, atp9a, palm3, evalc, scn1b, penk, mgarp, mgmt1, slit2, cxcl5, gfpt2, phex, fgf11, ccnd2, slco2a1, cidea, lif, mzt1, mpz, rbp1, orai2, fgf5, naa50, gm20939, fbn1, akap2, ndrg1, hk1, psmc1, cpeb2, ugcg, ngf, caq1, appl1, slc4a7, tnxb, pcna-ps2, myh11, adamts1, tmp1, zfyve1, stx16, map3k2, lmod2, itgb7, slc1a2, igha, tbc1d2, pgam2, s100a16, adprhl1, traf1, fubp1, olfml2a, atp11b, clta, lce1f, adamts15, has2, azin2, mterf1b, aatk, cxcl3, arhgap36, cltb, itgb5, ucp1,</p>                                                                                                                                                                                                                                                                                                                                                                                                                                                                                                                                                                                                                                                                                                                                                                                                                                                                                                                                                                                                                                                                                                                                                                                                                                                                                                                                                                                                                        |

|                                                                                                                                                                                                                                                                                                                                                                                                                                                                                                                                                                                                                                                                                                                                                                                                                                                                                                                                                                                                                                                                                                                                                                                                                                                                                                                                                                                                                                                                                                                                                                                                                                                                                                                                                                                                                                                                                                                                                                                                                                                                                                                                                                                                                                                                                                                                                                                                                                                                                                                                                                                                                                                                   |
|-------------------------------------------------------------------------------------------------------------------------------------------------------------------------------------------------------------------------------------------------------------------------------------------------------------------------------------------------------------------------------------------------------------------------------------------------------------------------------------------------------------------------------------------------------------------------------------------------------------------------------------------------------------------------------------------------------------------------------------------------------------------------------------------------------------------------------------------------------------------------------------------------------------------------------------------------------------------------------------------------------------------------------------------------------------------------------------------------------------------------------------------------------------------------------------------------------------------------------------------------------------------------------------------------------------------------------------------------------------------------------------------------------------------------------------------------------------------------------------------------------------------------------------------------------------------------------------------------------------------------------------------------------------------------------------------------------------------------------------------------------------------------------------------------------------------------------------------------------------------------------------------------------------------------------------------------------------------------------------------------------------------------------------------------------------------------------------------------------------------------------------------------------------------------------------------------------------------------------------------------------------------------------------------------------------------------------------------------------------------------------------------------------------------------------------------------------------------------------------------------------------------------------------------------------------------------------------------------------------------------------------------------------------------|
| <p>tmeff2, dusp1, hdac4, txndc2, rab6b, maob, acox2, spdef, manba, sesn2, phactr1, mthfd2, kcnj4, dock1, sat1, plet1, ctdspl, gjb5, myh3, slc5a5, mlxipl, gpr97, tnfaip3, cald1, gjc3, wnt11, pak6, grhl3, tfap4, rgs10, snx30, foxo3, cgnl1, csf1, hist1h2bc, stx11, mbp, gria3, rnd1, nk2, vamp7, cbx3, rasl11a, dtx4, zik1, tll1,.mvp, xrcc5, pde1a, nefm, map7, tnfaip6, pdk1, slc30a4, sp3, b3galt5, cox8b, inhba, fastkd1, pik3c2a, trp53inp1, arhgap23, slc39a4, plk2lox, rnf138, sp4, nes, aplp1, pde8a, tnfrsf1b, vat1, nedd1, ptp4a3, fap, gpr176, s100a7a, atg9b, nrap, ldb3, tshr, slc18a2, myh8, pacsin1, pcyox11, sqstm1, il1rl1, clec4d, neurl3, ubxn2b, xiap, otoa, map7d2, ptk2b, gal, alg6, pds5b, arhgef28, capn3, bfsp1, col4a1, lama2, espn, tpm3-rs7, gm10073, hist3h2ba, plek2, mov10l1, aim1, kpna3, ccdc80, ier3, arhgef3, klhdc7a, anpep, wdr35, wnt5a, tnc, actc1, myom2, emp2, ndufaf2, kcnf1, rps27, crim1, ctsw, myf6, abca1, ccl9, itm2b, atp10a, atad2, cck, ythdc2, xdh, krt19, apbb1ip, bdkrb1, ddx3y, gsn, col16a1, zfp385a, adamts11, cxcl2, mdk, ar15a, s100a8, impad1, agt, loxl4, gpr3711, cd55, rgs3, mybpc2, ptgis, gem, ntn4, olfml3, tgfb1i1, sparcl1, p2rx6, sfn, sod3, mapk13, procr, tecta, zfp418, icam1, pif1, sp7gm8730, ppp3cb, cyr61, fxyd5, tubb2a, syne4, plekhh1, cav3, tcap, rcan2, kif1a, ptn, mdm2, tlr9, atp1b2, timp3, pik3r3, ankrd2, ucp2, rgl1, cdc42ep1, map6, ppap2b, cxcl14, hmga1, cdkn1b, acta2, casq2, sneg, las11, tec, klk8, il11, btg2, adrb2, dcun1d1, cdkn1a, rhobtb3, dmp1, ddx6, shpk, rom1, tgfb1, nuak2, alr18a, ccl7, phldb3, mcam, gpnmb, fcgrt, il21r, krt76, eef1a2, fign1, itgb1bp2, loxl1, s100a9, aff3, plxnb3, lsm8, e2f2, myod1, fmod, mettl4, itm2c, stk17b, neurl3, dmp1, adamts13, hcls1, ndrg2, sept1, tbc1d9, grb14, htra3, klhl26, vdr, rap2c, sgk1, abcb7, nup62cl, mob1b, blnk, lamc3, itgb3, slc1a5, efna5, rab32, myo1e, sphk1, rgs16, cxcl16, wnt10b, scube3, map1a, lingo2, tgfbr3, nucks1, ikbke, tubb2b, plscr2, pls3, slc16a1, tubb4a, peak1, depdc1a, pde8b, rpl19, kbtbd7, myh7, cacna1s, arap2, rgs9, fxyd3, slc25a48, cx3cl1, cpe, polr2f, lin7c, ccdc109b, foxd3, cd34, pgm5, eda2r, leo1, pde1b, pgf, islr, jsrp1, creb3l1, trmt61a, p2rx7, sln, syf2, krt8, camk1d, des, os9, itpr3, lfng, clip1, lce1h, slc4a11, vps11, gdnf, wnt7b, atp13a3, tec, agtr2, zbtb14, trib3, cldn5, lmcd1, ppif, sacm11, nt5dc2, lrrn1, tro, tescl, rhobtb2, hfe2, 9530053a07rik, uch11, rnf19b, adat1, plp1, ctgf, chordc1, lgals9, atp2a1, dusp6, myog, lpin1, tmx3, zpf28, trpv2, fmr1, kcna6, slc38a3, slc5a3, eif2s3y, ngfr, mybpc1, il4ra, kcnj8, atp2b4, svop</p> |
|-------------------------------------------------------------------------------------------------------------------------------------------------------------------------------------------------------------------------------------------------------------------------------------------------------------------------------------------------------------------------------------------------------------------------------------------------------------------------------------------------------------------------------------------------------------------------------------------------------------------------------------------------------------------------------------------------------------------------------------------------------------------------------------------------------------------------------------------------------------------------------------------------------------------------------------------------------------------------------------------------------------------------------------------------------------------------------------------------------------------------------------------------------------------------------------------------------------------------------------------------------------------------------------------------------------------------------------------------------------------------------------------------------------------------------------------------------------------------------------------------------------------------------------------------------------------------------------------------------------------------------------------------------------------------------------------------------------------------------------------------------------------------------------------------------------------------------------------------------------------------------------------------------------------------------------------------------------------------------------------------------------------------------------------------------------------------------------------------------------------------------------------------------------------------------------------------------------------------------------------------------------------------------------------------------------------------------------------------------------------------------------------------------------------------------------------------------------------------------------------------------------------------------------------------------------------------------------------------------------------------------------------------------------------|

**Supplementary Table S2.** Primer used for real-time PCR

| Gene      | Primer Forward           | Primer Reverse               |
|-----------|--------------------------|------------------------------|
| HDAC4     | GTCTTGGGAATGTACGA<br>CGC | GTTGCCAGAGCTGCTATTT<br>G     |
| Cyclin E1 | GGCGAGGATGAGAGCAG<br>TTC | CGATCAAAGAAGAAGTCC<br>TGTGCC |
| Cyclin A2 | CCCTGCATTTGGGTGTG<br>AAC | GGTGCTCCATTCTCAGAAC<br>C     |
| Pax7      | TCCCCCTGGAAGTGTCC<br>A   | TGGGAAACACGGAGCTGA           |
| e-MHC     | TGGTCGTAATCAGCAGC<br>A   | TCGTCTCGCTTTGGCAA            |
| P21       | AGCGCGTTCGGAGCCTA        | CCGTTTTTCGGCCCTGAGA          |
| Sharp1    | GGAGCTTGAAGCGAGACGAT     | GAGCGCTCCCCATTCTGTAA         |
| Bax       | GCCTCCTCTCCTACTTCG<br>GG | TGAGGACTCCAGCCACAA<br>AGA    |
| Bcl-2     | AAGCTGTCACAGAGGGG<br>CTA | TCTCAGGCTGGAAGGAGA<br>AG     |

**a**

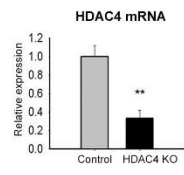

**b**

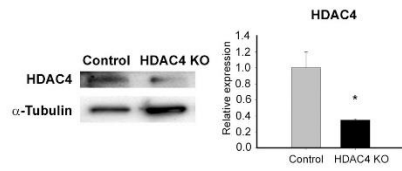

**a**

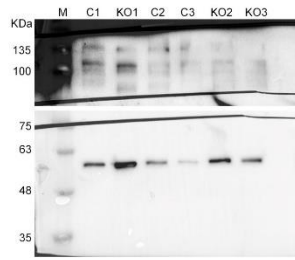

**b**

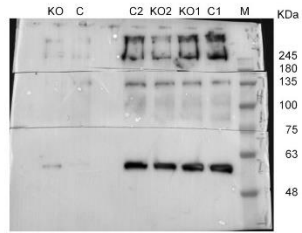



**a**

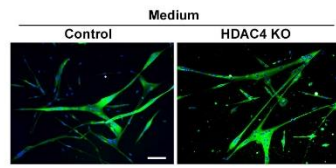

**b**

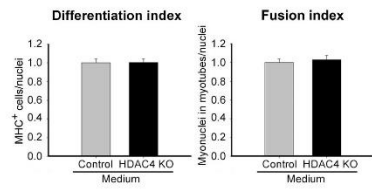

**c**

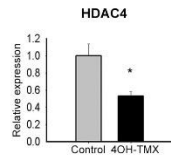

**a**

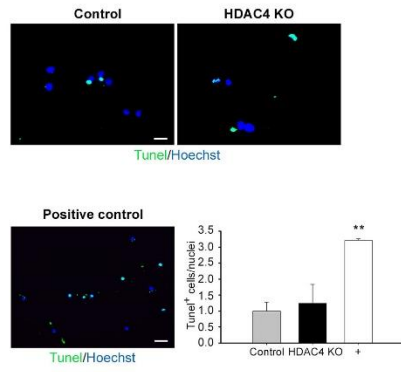

**b**

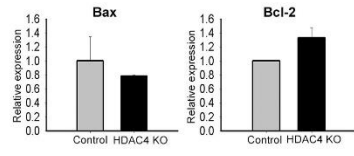

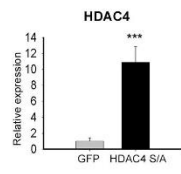

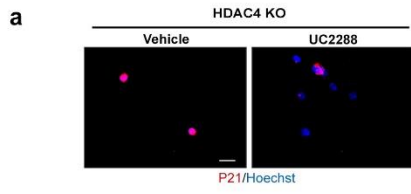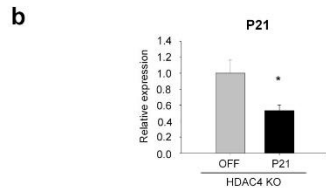

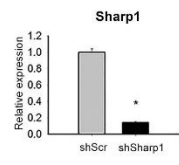

Supplement: 41598_2018_21835_MOESM1_ESM.pdf [file 41598_2018_21835_MOESM1_ESM.pdf]
